# Supplementary material for: Nano-ZnS decorated hierarchically porous carbon electrocatalyst with multiple enzyme-like activities as a nanozyme sensing platform for simultaneous detection of dopamine, uric acid, guanine, and adenine
Source: Royal Society of Chemistry journal article supplement (doi:10.1039/d1nr06017a), 2021-01-01
Supplement: d1nr06017a1.pdf [file d1nr06017a1.pdf]

**Electronic support information (ESI) for Nanoscale**  
**Nano-ZnS decorated hierarchically porous carbon**  
**electrocatalyst with multiple enzyme-like activities as**  
**nanozyme sensing platform for simultaneous detection of**  
**dopamine, uric acid, guanine, and adenine**

Kai Zhang<sup>a</sup>, Zhonghui Zhuo<sup>a</sup>, Guorong Fan<sup>a</sup>, Zongde Wang<sup>a</sup>, Shangxing Chen<sup>a</sup>, Lulu Xu<sup>b</sup>, Yangping Wen<sup>b\*</sup>, Peng Wang<sup>a\*</sup>

<sup>a</sup>College of Forestry, Jiangxi Agricultural University, East China Woody Fragrance and Flavor Engineering Research Center of National Forestry and Grassland Administration, Nanchang 330045, P.R. China

<sup>b</sup> Key Laboratory of Chemical Utilization of Plant Resources of Nanchang, Institute of Functional Materials and Agricultural Applied Chemistry, Jiangxi Agricultural University, Nanchang 330045, People's Republic of China

\*Corresponding author

E-mail: wenyangping1980@gmail.com (Y. Wen)

pengwang1981@126.com (P. Wang)

## Content

|                                                                                                     |     |
|-----------------------------------------------------------------------------------------------------|-----|
| 1. XRD of different materials.....                                                                  | S3  |
| 2. TEM of different materials.....                                                                  | S4  |
| 3. EISs and CVs of different materials.....                                                         | S5  |
| 4. CVs of DA, UA, G and A.....                                                                      | S6  |
| 5. Peroxidase and oxidase activity of different materials.....                                      | S7  |
| 6. Simultaneous detection of DA, UA, G and A.....                                                   | S8  |
| 7. Interference.....                                                                                | S9  |
| 8. Repeatability and reproducibility.....                                                           | S10 |
| 9. Comparative analysis of synthetic methods of zinc sulfide-carbon composites in recent years..... | S11 |
| 10. Elemental composition of different materials from XPS analysis.....                             | S12 |
| 11. $I_D/I_G$ values of Raman spectra of different materials.....                                   | S13 |
| 12. Textural properties of different materials.....                                                 | S14 |
| 13. Comparative analysis of DA, UA, G and A with different electrodes in recent years.....          | S15 |

## 1. XRD of different material

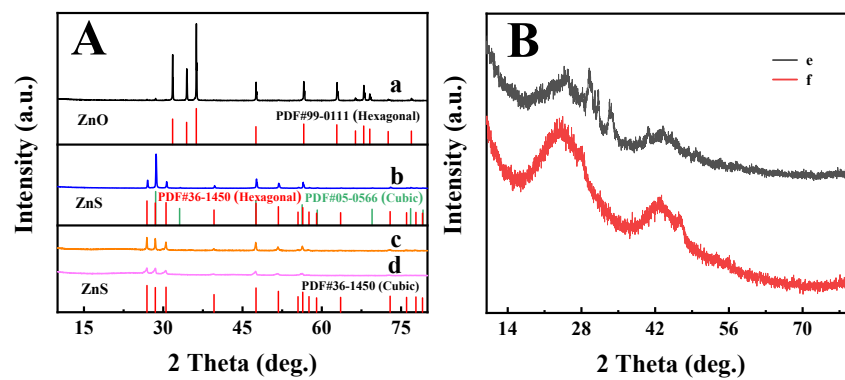

**Figure S1** Wide-angle XRD patterns of unetched ZS (a), ZS (b), unetched ZSHPC (c), ZSHPC (d), unetched PC (e) and PC (f).

## 2. TEM of different materials

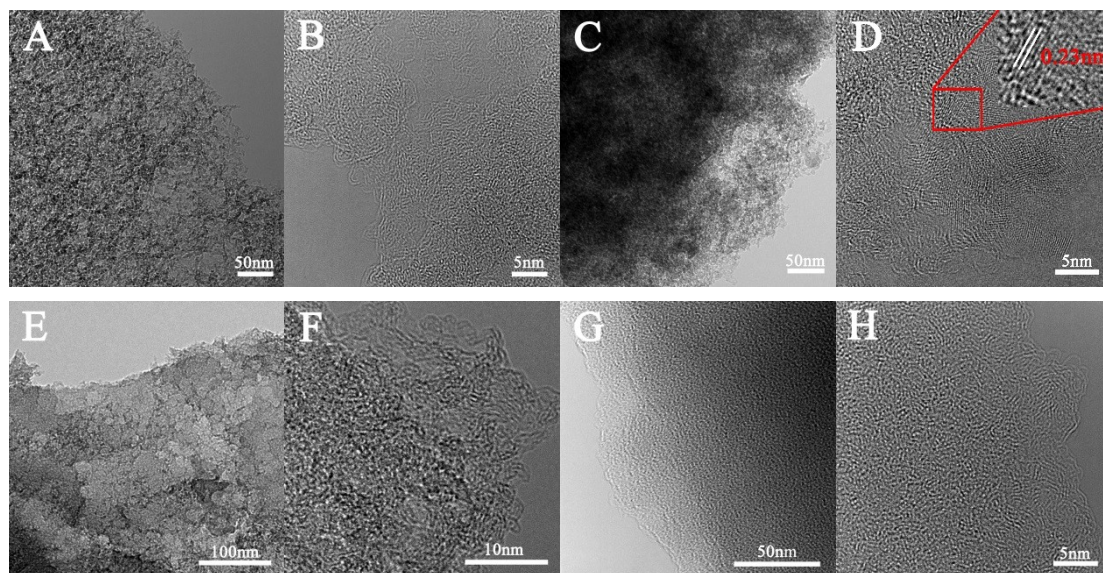

**Figure S2** TEM images of ZHPC (A and B), ZSPC (D and E), SHPC (E and F), and PC (G and H).

### 3. EIS and CVs of different materials

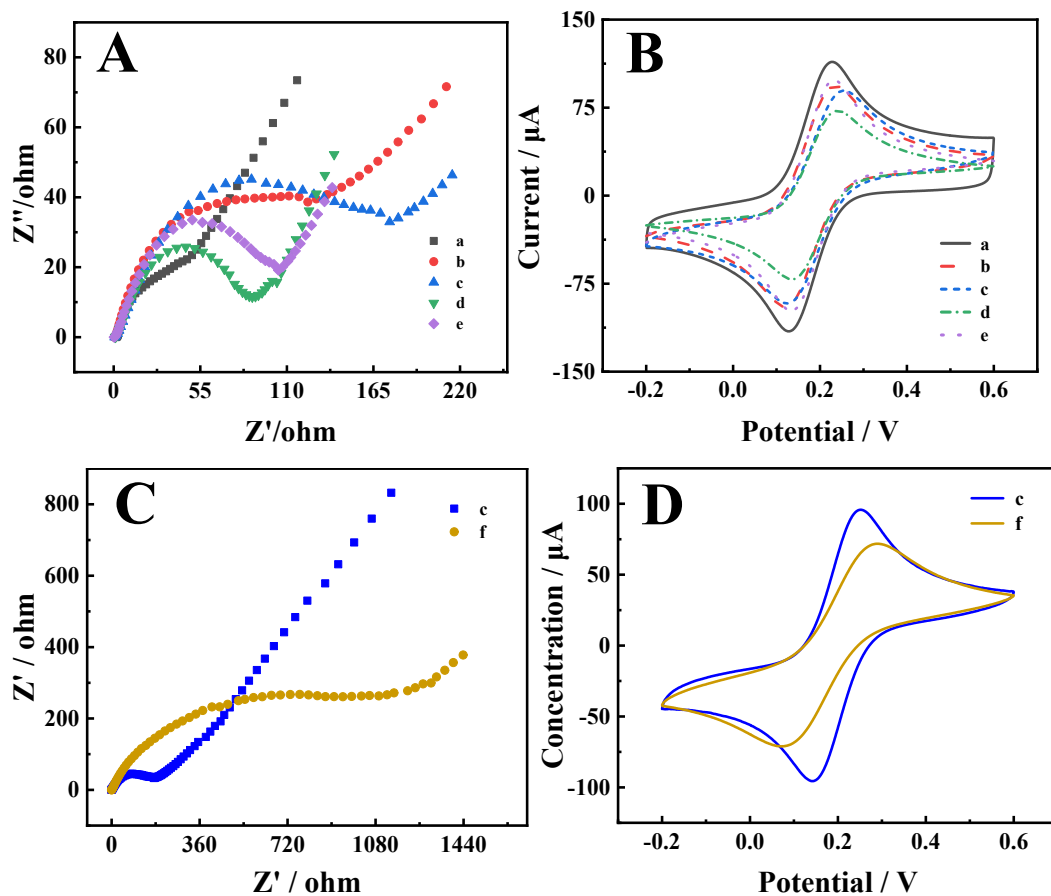

**Figure S3** Nyquist plots (A and C) and CVs (B and D) of HPC/GCE (a), SPC/GCE (b), PC/GCE (c), ZS/GCE (d), bare GCE (e) and unetched PC/GCE (f).

#### 4. CVs of DA, UA, G and A

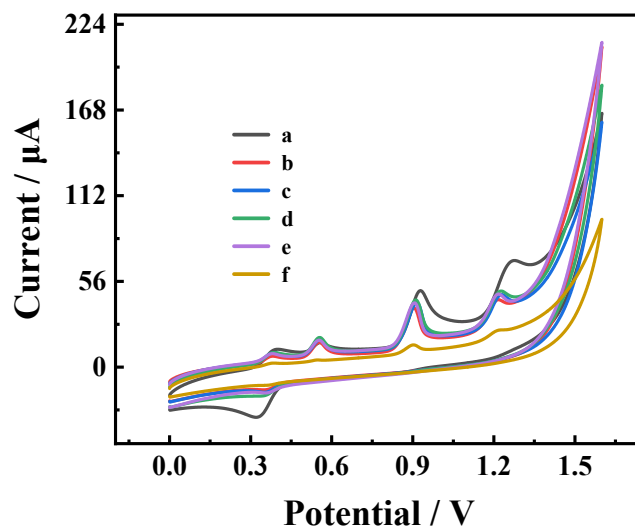

**Figure S4** CVs of 60  $\mu\text{M}$  DA, UA, G and A at ZSHPC/GCE (a), ZHPC/GCE (b), ZSPC/GCE (c), SHPC/GCE (d), PC/GCE (e) and bare GCE (f) in 0.1 M PBS (pH = 3.0).

## 5. Peroxidase and oxidase activity of different materials

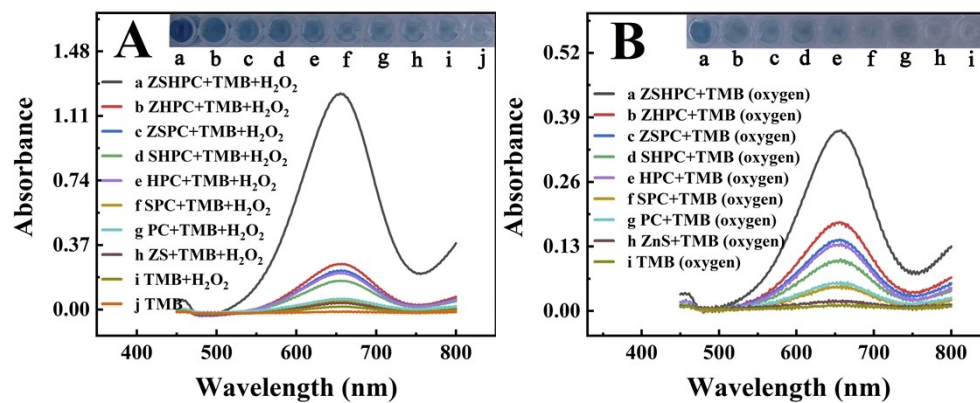

**Figure S5** UV-vis absorption spectra of TMB + different materials system in the presence of H<sub>2</sub>O<sub>2</sub>

(A) and different materials system in the presence of TMB (B). Insets are corresponding photographs of above.

## 6. Simultaneous detection of DA, UA, G and A

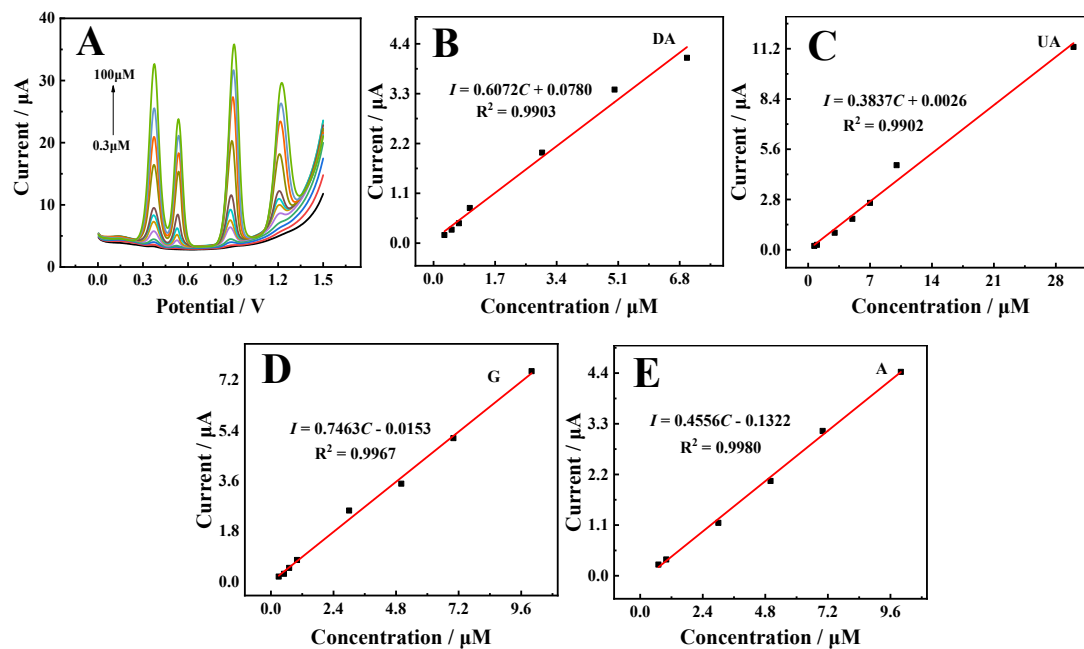

**Figure S6.** DPVs obtained for the simultaneous addition of DA, UA, G and A in the concentration range of 0.3 to 100  $\mu\text{M}$  each at ZSHPC/GCE in 0.1 M PBS (pH = 3.0), and the relationship between concentration and  $I_{p,a}$  at low concentrations of DA (B), UA (C), G (D) and A (E).



## 7. Interference, repeatability and reproducibility

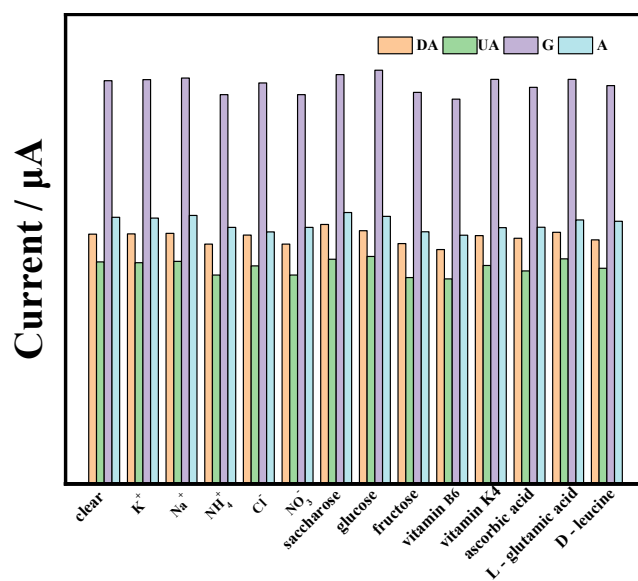

**Figure S7** Influence of coexisting substances on the current response of DA, UA, G and A for ZSHPC/GCE in 0.1 M PBS (pH = 3.0) containing 60  $\mu\text{M}$  DA, UA, G and A and several interferences.

## 8. Repeatability and reproducibility

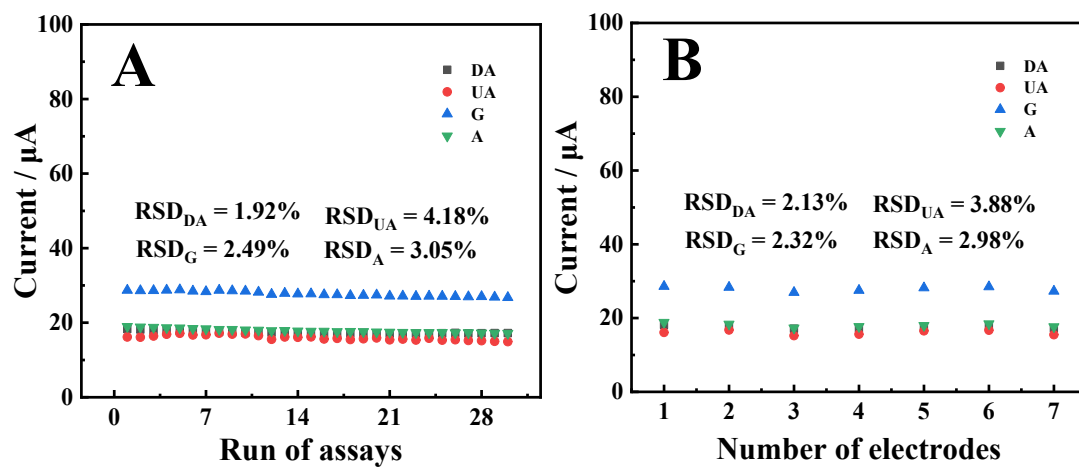

**Figure S8** The repeatability (A) and reproducibility (B) of ZSHPC/GCE for voltametric responses of DA, UA, G and A.

## 9. Comparative analysis of synthetic methods of zinc sulfide-carbon composites

in recent years

**Table S1** Comparative analysis of synthetic methods of zinc sulfide-carbon composites in recent years.

| zinc source   | sulfur source   | carbon source               | process                                                                                                                                                                                                    | Ref       |
|---------------|-----------------|-----------------------------|------------------------------------------------------------------------------------------------------------------------------------------------------------------------------------------------------------|-----------|
| zinc acetate  | sodium sulfide  | multiwalled carbon nanotube | step 1 synthesis of negatively charged zinc sulfide<br>step 2 synthesis of positively charged multiwalled carbon nanotube<br>step 3 synthesis of zinc sulfide-carbon composite by heteroaggregation        | 1,2       |
| Zinc nitrate  | sodium sulfide  | multiwalled carbon nanotube | step 1 synthesis of SiO <sub>2</sub> @ carbon nanotube<br>step 2 synthesis of SiO <sub>2</sub> /ZnSilicate@ carbon nanotube<br>step 3 synthesis of zinc sulfide@ carbon nanotube by hydrothermal treatment | 3         |
| zinc acetate  | thiocarbamide   | PVA/PTFE nanofiber          | step 1 synthesis of preoxidized PVA/PTFE nanofiber by spinning process<br>step 2 synthesis of zinc sulfide-carbon composite by solvothermal treatment                                                      | 4         |
| zinc sulfate  | sodium sulfide  | graphene                    | step 1 synthesis zinc sulfide<br>step 2 synthesis of zinc sulfide-graphene composite by hydrothermal treatment                                                                                             | 5         |
| zinc acetate  | chicken feather | chicken feather             | one pot hydrothermal treatment of aqueous solution of zinc acetate and chicken feather                                                                                                                     | 6         |
| zinc acetate  | pig bristle     | pig bristle                 | one pot reflux of zinc acetate and pig bristle in potassium hydroxide aqueous solution                                                                                                                     | 7         |
| zinc chloride | sulfuric acid   | leave of camphor tree       | one pot hydrothermal treatment of zinc chloride and leave of camphor tree in sulfuric acid aqueous solution                                                                                                | This work |

## 10. $I_D / I_G$ values of Raman spectra of different materials.

**Table S2**  $I_D / I_G$  values of Raman spectra of different materials.

| Different carbon materials | $I_D / I_G$ |
|----------------------------|-------------|
| ZSHPC                      | 1.0527      |
| ZHPC                       | 1.0103      |
| ZSPC                       | 1.0632      |
| SHPC                       | 1.0476      |
| PC                         | 1.0466      |

## 11. Elemental composition of different materials from XPS analysis

**Table S3** Elemental composition of different materials from XPS analysis.

| Sample | % Carbon (C1s) | % Zinc (Zn2p) | % Sulfur (S2p) | % Oxygen (Os1) |
|--------|----------------|---------------|----------------|----------------|
| ZSHPC  | 91.46          | 0.51          | 1.76           | 3.84           |
| ZHPC   | 88.92          | /             | 0.38           | 6.97           |
| ZSPC   | 83.95          | 3.08          | 3.43           | 6.37           |
| SHPC   | 94.28          | /             | 0.78           | 4.93           |
| PC     | 85.33          | /             | /              | 11.59          |

## 12. Textural properties of different materials

**Table S4** Textural properties of different materials.

| Textural property | S <sub>BET</sub> (m <sup>2</sup> /g) | Pore volume (cm <sup>3</sup> /g) | Micropore-H-K (nm) | Mesoporous-DFT (nm) | Macropore-DFT (nm) |
|-------------------|--------------------------------------|----------------------------------|--------------------|---------------------|--------------------|
| ZSHPC             | 1116.59                              | 2.11                             | 0.63               | 22.65               | 48.69              |
| ZHPC              | 911.83                               | 1.38                             | 0.54               | 22.65               | 45.90              |
| ZSPC              | 728.89                               | 0.57                             | 0.59               | /                   | 48.69              |
| SHPC              | 541.44                               | 0.48                             | 0.66               | 22.65               | 48.69              |
| PC                | 198.43                               | 0.12                             | /                  | /                   | /                  |
| unetched PC       | 13.61                                | /                                | /                  | /                   | /                  |

### 13. Comparative analysis of DA, UA, G and A with different electrodes in recent years

**Table S5** Comparison and analysis of DA, UA, G and A with different electrodes in recent years.

| Electrode                              | Linear range ( $\mu\text{M}$ ) |           |           |           | Detection limit ( $\mu\text{M}$ ) |       |       |       | Ref       |
|----------------------------------------|--------------------------------|-----------|-----------|-----------|-----------------------------------|-------|-------|-------|-----------|
|                                        | DA                             | UA        | G         | A         | DA                                | UA    | G     | A     |           |
| p-GLY/GO/GCE                           | 0.2-62                         | 0.10-105  | 0.15-48   | 0.090-103 | 0.63                              | 0.59  | 0.48  | 1.28  | 8         |
| Au/HG                                  | 0.4-20                         | 0.6-40    | 6-500     | 0.6-40    | 0.02                              | 0.57  | 2.5   | 0.42  | 9         |
| Ag@Cu <sub>2</sub> O@GO/GCE            | 0.001-0.5                      | 0.05-6    | 0.002-1   | 0.02-6    | 0.1                               | 6.0   | 0.2   | 3.0   | 10        |
| PI <sub>mox</sub> -GO/GCE              | 12-278                         | 3.6-249.6 | 3.3-103.3 | 9.6-215   | 18                                | 0.63  | 6.48  | 1.28  | 11        |
| PAE/GCE                                | 2.5-75                         | 10-750    | 7.5-75    | —         | 0.075                             | 0.35  | 0.025 | —     | 12        |
| Nano-Au/DNA/nano-Au/<br>Poly (SFR)/GCE | 0.008-1.1                      | 0.09-12   | 0.009-5.0 | 0.06-0.8  | 0.2                               | 8.0   | 0.5   | 4.0   | 13        |
| FeTe <sub>2</sub> /GP                  | 5-120                          | 3-120     | 1-160     | 3-100     | 0.028                             | 0.042 | 0.034 | 0.026 | 14        |
| ZSHPC/GCE                              | 0.3-500                        | 0.7-500   | 0.3-500   | 0.5-500   | 0.116                             | 0.262 | 0.07  | 0.075 | This work |

## References

1. L. K. Sarpong, M. Bredol, M. Schönhoff, *Carbon*, 2017, **125**, 480-491.
2. L. K. Sarpong, M. Bredol, M. Schönhoff, A. Wegrzynowicz, K. Jenewein, H. Uphoff, *Optical Materials*, 2018, **86**, 398-407.
3. X. Y. Hou, T. Peng, J. B. Cheng, Q. H. Yu, R. J. Luo, Y. Lu, X. M. Liu, J. K. Kim, J. He, Y. S. Luo, *Nano Res.*, 2017, **10**, 2570-2583.
4. L. Y. Wang, J. G. Ju, N. P. Deng, G. Wang, B. W. Cheng, W. M. Kang, *Electrochem. Commun.*, 2018, **96**, 1-5.
5. A. Hassan, R. Liaquat, N. Iqbal, G. Ali, X. Fan, Z. L. Hu, M. Anwar, A. Ahmad, *J. Electroanal. Chem.*, 2021, **889**, 115223.
6. V. M. Rangaraj, A. A. Edathil, P. Kadirvelayutham, F. Banat, *Mater. Chem. Phys.*, 2020, **248**, 122953.
7. C. M. Cova, A. Zuliani, M. J. Muñoz-Batista, R. Luque, *ACS Sustainable Chem. Eng.*, 2019, **7**, 1300-1307.
8. S. Y. He, P. He, X. Q. Zhang, X. J. Zhang, K. L. Liu, L. P. Jia, F. Q. Dong, *Anal. Chim. Acta*, 2018, **1031**, 75-82.
9. S. H. Gao, H. J. Li, M. J. Li, C. P. Li, L. R. Qian, B. H. Yang, *J. Solid State Electrochem.*, 2018, **22**, 3245-3254.
10. T. Gan, Z. K. Wang, Z. X. Shi, D. Y. Zheng, J. Y. Sun, Y. M. Liu, *Biosens. Bioelectron.*, 2018, **112**, 23-30.
11. X. F. Liu, L. Zhang, S. P. Wei, S. H. Chen, X. Ou, Q. Y. Lu, *Biosens. Bioelectron.*, 2014, **57**, 232-238.
12. H. Y. Li, X. L. Wang and Z. X. Wang, *Anal. Sci.*, 2015, **31**, 1225-1231.
13. L. M. Niu, K. Q. Lian, H. M. Shi, Y. B. Wu, W. J. Kang, S. Y. Bi, *Sens. Actuators, B*, 2013, **178**, 10-18.
14. S. Pradhan, S. Pramanik, D. K. Das, R. Bhar, R. Bandyopadhyay, P. Millner, P. Pramanik, *New J. Chem.*, 2019, **43**, 10590-10600.
